# Supplementary material for: Knotted vs. Unknotted Proteins: Evidence of Knot-Promoting Loops
Source: PLOS journal article supplement (doi:10.1371/journal.pcbi.1000864), 2010-07-29
Supplement: S2 (10.1371/journal.pcbi.1000864.s002) [file journal.pcbi.1000864.s002]

Supporting Information - figure S2  
 “Knotted vs. unknotted proteins: evidence of knot-promoting loops”

Raffaello Potestio<sup>1</sup>, Cristian Micheletti<sup>1,2,3,\*</sup>, Henri Orland<sup>4</sup>

*1 SISSA - Scuola Internazionale Superiore di Studi Avanzati, via Bonomea 265, 34136 Trieste, Italy*

*2 DEMOCRITOS CNR-IOM*

*3 Italian Institute of Technology (SISSA unit)*

*4 Institut de Physique Théorique, CEA, F-91191 Gif-sur-Yvette, France*

*\* E-mail: michelet@sissa.it*

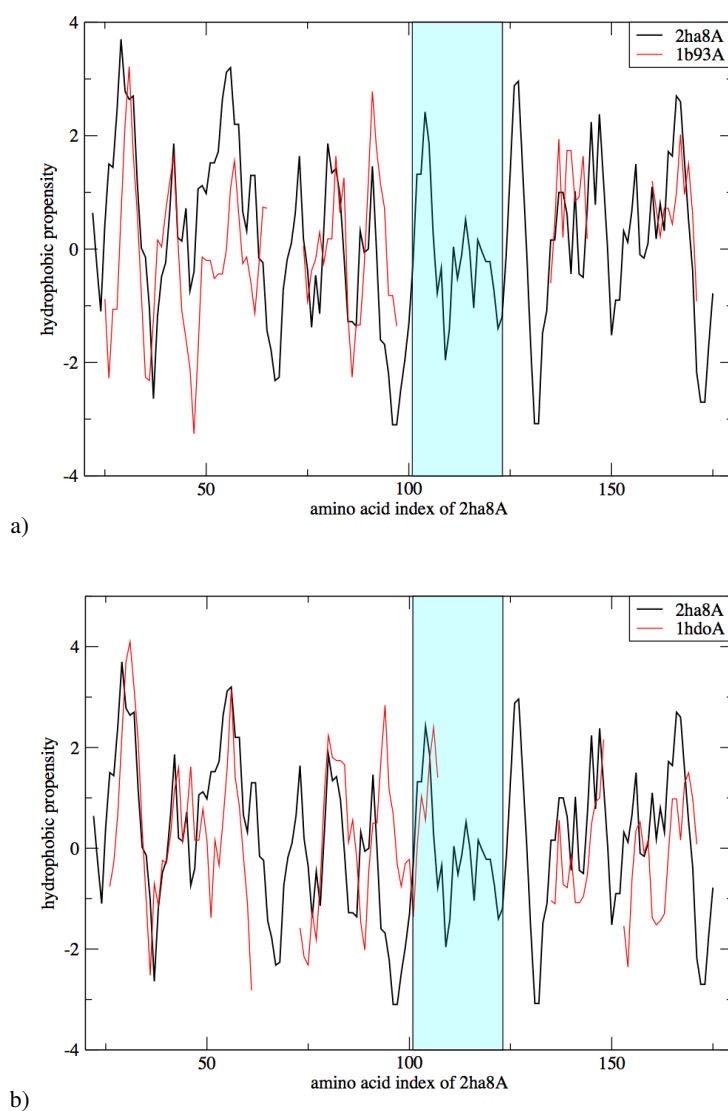

Hydrophobicity profiles for the knotted protein 2ha8A and the MISTRAL structurally-matching amino acids of the unknotted protein 1b93A (panel a) and 1hdoA (panel b). The knot-promoting segment (101–123) is highlighted by the light blue box. The hydrophobicity was calculated using the Kyte and Doolittle scale and an averaging window of 5 amino acids. Notice that, at variance with the case in panel a, the MISTRAL alignment of 2ha8A and 1hdoA, panel b, is non-sequential (see diagram in Fig. 3 of our paper) and shows two gaps, one of which is the knot-promoting segment.
