# Supplementary material for: Knotted vs. Unknotted Proteins: Evidence of Knot-Promoting Loops
Source: PLOS journal article supplement (doi:10.1371/journal.pcbi.1000864), 2010-07-29
Supplement: S4 (10.1371/journal.pcbi.1000864.s004) [file journal.pcbi.1000864.s004]

Supporting Information - table S1  
**“Knotted vs. unknotted proteins: evidence of knot-promoting loops”**

Raffaello Potestio<sup>1</sup>, Cristian Micheletti<sup>1,2,3,\*</sup>, Henri Orland<sup>4</sup>

*1 SISSA - Scuola Internazionale Superiore di Studi Avanzati, via Bonomea 265, 34136 Trieste, Italy*

*2 DEMOCRITOS CNR-IOM*

*3 Italian Institute of Technology (SISSA unit)*

*4 Institut de Physique Théorique, CEA, F-91191 Gif-sur-Yvette, France*

*\* E-mail: michelet@sissa.it*

|       |       |       |       |       |       |        |       |       |       |
|-------|-------|-------|-------|-------|-------|--------|-------|-------|-------|
| 1a42A | 1am6A | 1azmA | 1bcdA | 1bicA | 1bnqA | 1bnuA  | 1bnwA | 1bv3A | 1bzmA |
| 1cahA | 1caiA | 1cajA | 1cakA | 1calA | 1camA | 1cayA  | 1cazA | 1cilA | 1cngA |
| 1craA | 1czmA | 1dmxA | 1dmyA | 1eouA | 1fjA  | 1fqnA  | 1fqrA | 1fr4A | 1fsqA |
| 1fsrA | 1g0eA | 1g0fA | 1g1dA | 1g3zA | 1g45A | 1g46A  | 1g48A | 1g4jA | 1g4oA |
| 1g52A | 1g54A | 1gz0A | 1gz0B | 1gz0D | 1gz0F | 1gz0H  | 1hcbA | 1heaA | 1hecA |
| 1huhA | 1i8zA | 1i90A | 1i91A | 1i91A | 1i9mA | 1i9nA  | 1i9oA | 1i9pA | 1i9qA |
| 1if4A | 1if5A | 1if6A | 1if7A | 1if8A | 1if9A | 1ipaA  | 1j9wA | 1jv0A | 1keqA |
| 1kwqA | 1kwrA | 1lg5A | 1nxzA | 1nxzB | 1o6dA | 1oq5A  | 1p71A | 1qmgA | 1qmgD |
| 1rayA | 1razA | 1rg9A | 1rj5A | 1rj6A | 1rzaA | 1rzcA  | 1rzdA | 1rzeA | 1slhI |
| 1t9nA | 1tb0X | 1tbtX | 1te3X | 1teuX | 1tg3A | 1tg9A  | 1th9A | 1thkA | 1ttmA |
| 1ugaA | 1ugcA | 1ugdA | 1ugeA | 1ugfA | 1uggA | 1urtA  | 1v9eA | 1v9iC | 1vh0A |
| 1x7pA | 1xd3A | 1xd3C | 1xegA | 1xevA | 1xevB | 1xpzA  | 1xq0A | 1yddA | 1yh1A |
| 1yo0A | 1yo1A | 1yo2A | 1yveI | 1z97A | 1zgeA | 1zgfA  | 1zh9A | 1zjrA | 1zsaA |
| 1zsbA | 2aw1A | 2ax2A | 2cbaA | 2cbbA | 2cbcA | 2cbdA  | 2cbeA | 2efvA | 2egvA |
| 2etlA | 2eu2A | 2eu3A | 2ez7A | 2fg6C | 2fg6D | 2fg6Z  | 2fg7C | 2fg7X | 2fnkA |
| 2fnmA | 2fnnA | 2foqA | 2fosA | 2fovA | 2foyB | 2g7mC  | 2g7mX | 2gehA | 2h15A |
| 2ha8A | 2hd6A | 2hfxA | 2hfyA | 2hkkA | 2hl4A | 2hocA  | 2nmxA | 2nmxB | 2nn1A |
| 2nn1B | 2nn7A | 2nngA | 2nnoA | 2nnsA | 2nnvA | 2nwoA  | 2nwpA | 2nwyA | 2nwzA |
| 2nxA  | 2nxA  | 2nxA  | 2o9cA | 2obvA | 2osfA | 2osmA  | 2p02A | 2pouA | 2povA |
| 2qmmA | 2qo8A | 2qp6A | 2rh3A | 2vvbX | 2wegA | 2wehA  | 2wejA | 3b4fA | 3bbdA |
| 3bbeA | 3bbhA | 3betA | 3bjxB | 3bl0A | 3c2wC | 3c2wH  | 3c7pA | 3cajA | 3czvB |
| 3d0nA | 3d93A | 3d9zA | 3da2A | 3dbuA | 3dc9A | 3dccA  | 3dcsA | 3dd0A | 3dd8A |
| 3dv7A | 3dvbA | 3dvcA | 3dvdA | 3eftA | 3f4xA | 3f8eA  | 3ffpX | 3gz0A | 3hkqA |
| 3hkuA | 3hs4A | 3iaiA | 3iaiB | 3iaiD | 3ibiA | 3iblaA | 3ibnA | 3ibuA | 3ic6A |
| 3iefA | 3ilkA | 3k2fA | 3ktyB | 3ktyC | 4cacA | 5cacA  |       |       |       |

List of knotted protein chains. The 247 listed entries were extracted from the December 2009 PDB release, using the procedure described in the Materials and Methods section of the main article.
