# Supplementary material for: Knotted vs. Unknotted Proteins: Evidence of Knot-Promoting Loops
Source: PLoS Comput Biol. 2010 Jul 29;6(7):e1000864. doi: 10.1371/journal.pcbi.1000864 (PMC2912335; doi:10.1371/journal.pcbi.1000864)
Supplement: Table S2 — Top ranking MISTRAL alignments of knotted and unknotted representatives. (0.06 MB PDF) [file pcbi.1000864.s005.pdf]

Supporting Information - table S2  
**“Knotted vs. unknotted proteins: evidence of knot-promoting loops”**

Raffaello Potestio<sup>1</sup>, Cristian Micheletti<sup>1,2,3,\*</sup>, Henri Orland<sup>4</sup>

*1 SISSA - Scuola Internazionale Superiore di Studi Avanzati, via Bonomea 265, 34136 Trieste, Italy*

*2 DEMOCRITOS CNR-IOM*

*3 Italian Institute of Technology (SISSA unit)*

*4 Institut de Physique Théorique, CEA, F-91191 Gif-sur-Yvette, France*

*\* E-mail: michelet@sissa.it*

| knotted<br>protein PDBid | unknotted<br>protein PDBid | fraction of aligned<br>knot residues |
|--------------------------|----------------------------|--------------------------------------|
| 2fg6C                    | 1ortA                      | 0.706                                |
| 2ha8A                    | 2qipA                      | 0.647                                |
| 2ha8A                    | 1b93A                      | 0.565                                |
| 2ha8A                    | 1f51E                      | 0.494                                |
| 1vh0A                    | 1b93A                      | 0.596                                |
| 2efvA                    | 2rjiA                      | 0.531                                |
| 2ha8A                    | 3fhkA                      | 0.412                                |
| 3bbeA                    | 1aoxA                      | 0.443                                |
| 2ha8A                    | 1u7oA                      | 0.459                                |
| 2ha8A                    | 2b98A                      | 0.494                                |
| 2fg6C                    | 1a4iA                      | 0.560                                |
| 1vh0A                    | 1d0iA                      | 0.426                                |
| 1vh0A                    | 2z5vA                      | 0.468                                |
| 2qmmA                    | 1hdoA                      | 0.651                                |
| 2ha8A                    | 1hdoA                      | 0.553                                |
| 2ha8A                    | 1d0iA                      | 0.518                                |
| 2ha8A                    | 3gpgA                      | 0.518                                |
| 2efvA                    | 1d8jA                      | 0.494                                |
| 2ha8A                    | 1c25A                      | 0.647                                |
| 3ktyC                    | 121pA                      | 0.413                                |

Top ranking MISTRAL alignments of knotted and unknotted representatives. In order to account for the different topology of the compared proteins, the alignments were obtained with the following non-default MISTRAL parameters: the alignment tolerance was set to 6.0 Å; the minimum segment length was set to 10 amino acids. For each alignment we report, in the third column, the percentage of the knotted region (defined in Table I of the main article) that takes part to the structural alignment. The listed pairs include only MISTRAL alignments with  $p\text{-value} \leq 5 \cdot 10^{-3}$ , where the percentage of the aligned knotted region is larger than 40.
